# Supplementary material
Source: publisher site journal article supplement (https://www.dovepress.com/article/315894)
Supplement: Supplementary file 1 [file get_supplementary_file.php]

Additional file 1: Table 1. The q-RT-PCR primers sequences used in this study

| Name | Sequence | |
| --- | --- | --- |
| circ-0003006 | Left | 5’-TGCAGAGACAACAAGGATGG-3’ |
|  | Right | 5’-AGGGACTGTTTGGGATAGGC-3’ |
| miR-524-3p | Forward | 5’-GCTGTGACCCTACAAAGGGA-3’ |
| Reverse | 5’-AGCATCAACTTCAACGCTGC-3’ |
| HIF-1A | Forward | 5’-GAACGTCGAAAAGAAAAGTCTCG-3’ |
| Reverse | 5’-CCTTATCAAGATGCGAACTCACA-3’ |
| GAPDH | Forward | 5’-GCACCGTCAAGGCTGAGAAC-3’ |
| Reverse | 5’-GGATCTCGCTCCTGGAAGATG-3’ |
| U6 | Forward | 5’- GCTTCGGCAGCACATATACTAAAAT-3’ |
| Reverse | 5’- CGCTTCACGAATTTGCGTGTCAT-3’ |

Additional file 2: Table 2. Correlations between circ-0003006 expression and clinicopathological features

| Characteristics | circ-0003006 | | p |
| --- | --- | --- | --- |
|  | Low expression (n=46) | High expression (n=69) | chi-squared test  p-value |
| Age (years) |  |  |  |
| ≤ 60 | 17 | 21 | 0.466 |
| > 60 | 29 | 48 |
| Gender |  |  |  |
| Male | 35 | 52 | 0.929 |
| Female | 11 | 17 |
| Tumor size (cm) |  |  |  |
| ≤ 5 | 34 | 32 | 0.003* |
| > 5 | 12 | 37 |
| Histological |  |  |  |
| Middle or high | 35 | 37 | 0.015* |
| Low or undiffer | 11 | 32 |
| TNM stage |  |  |  |
| I, II | 31 | 33 | 0.039* |
| III, IV | 15 | 36 |
| Lymph node metastasis |  |  |  |
| Positive | 28 | 54 | 0.043* |
| Negative | 18 | 15 |

Note: *p<0.05

Additional file 3: Table 3. The potential transcription factors of circ-0003006

| Cell_lines_name | Official_Symbol | CircRNA_name | Regulation_region |
| --- | --- | --- | --- |
| [GM12878](http://genome.ucsc.edu/cgi-bin/hgEncodeVocab?ra=encode/cv.ra&deprecated=true&term=GM12878) | [EBF1](http://genome.ucsc.edu/cgi-bin/hgEncodeVocab?ra=encode/cv.ra&deprecated=true&target=EBF1) | [hsa_circ_0003006](http://www.circbase.org/cgi-bin/singlerecord.cgi?id=hsa_circ_0003006) | -10Kb/1Kb |
| [GM12878](http://genome.ucsc.edu/cgi-bin/hgEncodeVocab?ra=encode/cv.ra&deprecated=true&term=GM12878) | [EGR1](http://genome.ucsc.edu/cgi-bin/hgEncodeVocab?ra=encode/cv.ra&deprecated=true&target=EGR1) | [hsa_circ_0003006](http://www.circbase.org/cgi-bin/singlerecord.cgi?id=hsa_circ_0003006) | -10Kb/1Kb |
| [GM12878](http://genome.ucsc.edu/cgi-bin/hgEncodeVocab?ra=encode/cv.ra&deprecated=true&term=GM12878) | [ELF1](http://genome.ucsc.edu/cgi-bin/hgEncodeVocab?ra=encode/cv.ra&deprecated=true&target=ELF1) | [hsa_circ_0003006](http://www.circbase.org/cgi-bin/singlerecord.cgi?id=hsa_circ_0003006) | -10Kb/1Kb |
| [GM12878](http://genome.ucsc.edu/cgi-bin/hgEncodeVocab?ra=encode/cv.ra&deprecated=true&term=GM12878) | [PAX5](http://genome.ucsc.edu/cgi-bin/hgEncodeVocab?ra=encode/cv.ra&deprecated=true&target=PAX5) | [hsa_circ_0003006](http://www.circbase.org/cgi-bin/singlerecord.cgi?id=hsa_circ_0003006) | -10Kb/1Kb |
| [GM12878](http://genome.ucsc.edu/cgi-bin/hgEncodeVocab?ra=encode/cv.ra&deprecated=true&term=GM12878) | [PBX3](http://genome.ucsc.edu/cgi-bin/hgEncodeVocab?ra=encode/cv.ra&deprecated=true&target=PBX3) | [hsa_circ_0003006](http://www.circbase.org/cgi-bin/singlerecord.cgi?id=hsa_circ_0003006) | -10Kb/1Kb |
| [GM12878](http://genome.ucsc.edu/cgi-bin/hgEncodeVocab?ra=encode/cv.ra&deprecated=true&term=GM12878) | [SPI1](http://genome.ucsc.edu/cgi-bin/hgEncodeVocab?ra=encode/cv.ra&deprecated=true&target=SPI1) | [hsa_circ_0003006](http://www.circbase.org/cgi-bin/singlerecord.cgi?id=hsa_circ_0003006) | -10Kb/1Kb |
| [GM12878](http://genome.ucsc.edu/cgi-bin/hgEncodeVocab?ra=encode/cv.ra&deprecated=true&term=GM12878) | [RUNX3](http://genome.ucsc.edu/cgi-bin/hgEncodeVocab?ra=encode/cv.ra&deprecated=true&target=RUNX3) | [hsa_circ_0003006](http://www.circbase.org/cgi-bin/singlerecord.cgi?id=hsa_circ_0003006) | -10Kb/1Kb |
| [GM12878](http://genome.ucsc.edu/cgi-bin/hgEncodeVocab?ra=encode/cv.ra&deprecated=true&term=GM12878) | [TCF12](http://genome.ucsc.edu/cgi-bin/hgEncodeVocab?ra=encode/cv.ra&deprecated=true&target=TCF12) | [hsa_circ_0003006](http://www.circbase.org/cgi-bin/singlerecord.cgi?id=hsa_circ_0003006) | -10Kb/1Kb |
| [GM12878](http://genome.ucsc.edu/cgi-bin/hgEncodeVocab?ra=encode/cv.ra&deprecated=true&term=GM12878) | [TCF3](http://genome.ucsc.edu/cgi-bin/hgEncodeVocab?ra=encode/cv.ra&deprecated=true&target=TCF3) | [hsa_circ_0003006](http://www.circbase.org/cgi-bin/singlerecord.cgi?id=hsa_circ_0003006) | -10Kb/1Kb |
| [GM12878](http://genome.ucsc.edu/cgi-bin/hgEncodeVocab?ra=encode/cv.ra&deprecated=true&term=GM12878) | [USF1](http://genome.ucsc.edu/cgi-bin/hgEncodeVocab?ra=encode/cv.ra&deprecated=true&target=USF1) | [hsa_circ_0003006](http://www.circbase.org/cgi-bin/singlerecord.cgi?id=hsa_circ_0003006) | -10Kb/1Kb |
| [GM12878](http://genome.ucsc.edu/cgi-bin/hgEncodeVocab?ra=encode/cv.ra&deprecated=true&term=GM12878) | [ZEB1](http://genome.ucsc.edu/cgi-bin/hgEncodeVocab?ra=encode/cv.ra&deprecated=true&target=ZEB1) | [hsa_circ_0003006](http://www.circbase.org/cgi-bin/singlerecord.cgi?id=hsa_circ_0003006) | -10Kb/1Kb |
| [GM12878](http://genome.ucsc.edu/cgi-bin/hgEncodeVocab?ra=encode/cv.ra&deprecated=true&term=GM12878) | [BHLHE40](http://genome.ucsc.edu/cgi-bin/hgEncodeVocab?ra=encode/cv.ra&deprecated=true&target=BHLHE40) | [hsa_circ_0003006](http://www.circbase.org/cgi-bin/singlerecord.cgi?id=hsa_circ_0003006) | -10Kb/1Kb |
| [GM12878](http://genome.ucsc.edu/cgi-bin/hgEncodeVocab?ra=encode/cv.ra&deprecated=true&term=GM12878) | [CHD2](http://genome.ucsc.edu/cgi-bin/hgEncodeVocab?ra=encode/cv.ra&deprecated=true&target=CHD2) | [hsa_circ_0003006](http://www.circbase.org/cgi-bin/singlerecord.cgi?id=hsa_circ_0003006) | -10Kb/1Kb |
| [GM12878](http://genome.ucsc.edu/cgi-bin/hgEncodeVocab?ra=encode/cv.ra&deprecated=true&term=GM12878) | [MAX](http://genome.ucsc.edu/cgi-bin/hgEncodeVocab?ra=encode/cv.ra&deprecated=true&target=MAX) | [hsa_circ_0003006](http://www.circbase.org/cgi-bin/singlerecord.cgi?id=hsa_circ_0003006) | -10Kb/1Kb |
| [GM12878](http://genome.ucsc.edu/cgi-bin/hgEncodeVocab?ra=encode/cv.ra&deprecated=true&term=GM12878) | [MAZ](http://genome.ucsc.edu/cgi-bin/hgEncodeVocab?ra=encode/cv.ra&deprecated=true&target=MAZ) | [hsa_circ_0003006](http://www.circbase.org/cgi-bin/singlerecord.cgi?id=hsa_circ_0003006) | -10Kb/1Kb |
| [GM12878](http://genome.ucsc.edu/cgi-bin/hgEncodeVocab?ra=encode/cv.ra&deprecated=true&term=GM12878) | [MXI1](http://genome.ucsc.edu/cgi-bin/hgEncodeVocab?ra=encode/cv.ra&deprecated=true&target=MXI1) | [hsa_circ_0003006](http://www.circbase.org/cgi-bin/singlerecord.cgi?id=hsa_circ_0003006) | -10Kb/1Kb |
| [GM12878](http://genome.ucsc.edu/cgi-bin/hgEncodeVocab?ra=encode/cv.ra&deprecated=true&term=GM12878) | [NFKB1](http://genome.ucsc.edu/cgi-bin/hgEncodeVocab?ra=encode/cv.ra&deprecated=true&target=NFKB) | [hsa_circ_0003006](http://www.circbase.org/cgi-bin/singlerecord.cgi?id=hsa_circ_0003006) | -10Kb/1Kb |
| [GM12878](http://genome.ucsc.edu/cgi-bin/hgEncodeVocab?ra=encode/cv.ra&deprecated=true&term=GM12878) | [EP300](http://genome.ucsc.edu/cgi-bin/hgEncodeVocab?ra=encode/cv.ra&deprecated=true&target=EP300) | [hsa_circ_0003006](http://www.circbase.org/cgi-bin/singlerecord.cgi?id=hsa_circ_0003006) | -10Kb/1Kb |
| [GM12878](http://genome.ucsc.edu/cgi-bin/hgEncodeVocab?ra=encode/cv.ra&deprecated=true&term=GM12878) | [POLR2A](http://genome.ucsc.edu/cgi-bin/hgEncodeVocab?ra=encode/cv.ra&deprecated=true&target=POLR2A) | [hsa_circ_0003006](http://www.circbase.org/cgi-bin/singlerecord.cgi?id=hsa_circ_0003006) | -10Kb/1Kb |
| [GM12878](http://genome.ucsc.edu/cgi-bin/hgEncodeVocab?ra=encode/cv.ra&deprecated=true&term=GM12878) | [SMC3](http://genome.ucsc.edu/cgi-bin/hgEncodeVocab?ra=encode/cv.ra&deprecated=true&target=SMC3) | [hsa_circ_0003006](http://www.circbase.org/cgi-bin/singlerecord.cgi?id=hsa_circ_0003006) | -10Kb/1Kb |
| [GM12878](http://genome.ucsc.edu/cgi-bin/hgEncodeVocab?ra=encode/cv.ra&deprecated=true&term=GM12878) | [TBL1XR1](http://genome.ucsc.edu/cgi-bin/hgEncodeVocab?ra=encode/cv.ra&deprecated=true&target=TBL1XR1) | [hsa_circ_0003006](http://www.circbase.org/cgi-bin/singlerecord.cgi?id=hsa_circ_0003006) | -10Kb/1Kb |
| [GM12878](http://genome.ucsc.edu/cgi-bin/hgEncodeVocab?ra=encode/cv.ra&deprecated=true&term=GM12878) | [USF2](http://genome.ucsc.edu/cgi-bin/hgEncodeVocab?ra=encode/cv.ra&deprecated=true&target=USF2) | [hsa_circ_0003006](http://www.circbase.org/cgi-bin/singlerecord.cgi?id=hsa_circ_0003006) | -10Kb/1Kb |
| [GM12878](http://genome.ucsc.edu/cgi-bin/hgEncodeVocab?ra=encode/cv.ra&deprecated=true&term=GM12878) | [WRNIP1](http://genome.ucsc.edu/cgi-bin/hgEncodeVocab?ra=encode/cv.ra&deprecated=true&target=WRNIP1) | [hsa_circ_0003006](http://www.circbase.org/cgi-bin/singlerecord.cgi?id=hsa_circ_0003006) | -10Kb/1Kb |
